# Supplementary material
Source: Springer Nature journal article supplement (https://www.springermedizin.de/resource/supplementary/12968_2008_58_MOESM1_ESM.pdf/9577900)

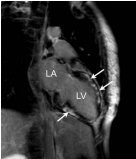

LA

LV

Supplement: MOESM1 [file 9577900]
